# Supplementary material
Source: PubMed Central journal article supplement (PMC9620779)
Supplement: NIHMS1843236-supplement-Supplemental_Material.pdf [file NIHMS1843236-supplement-Supplemental_Material.pdf]

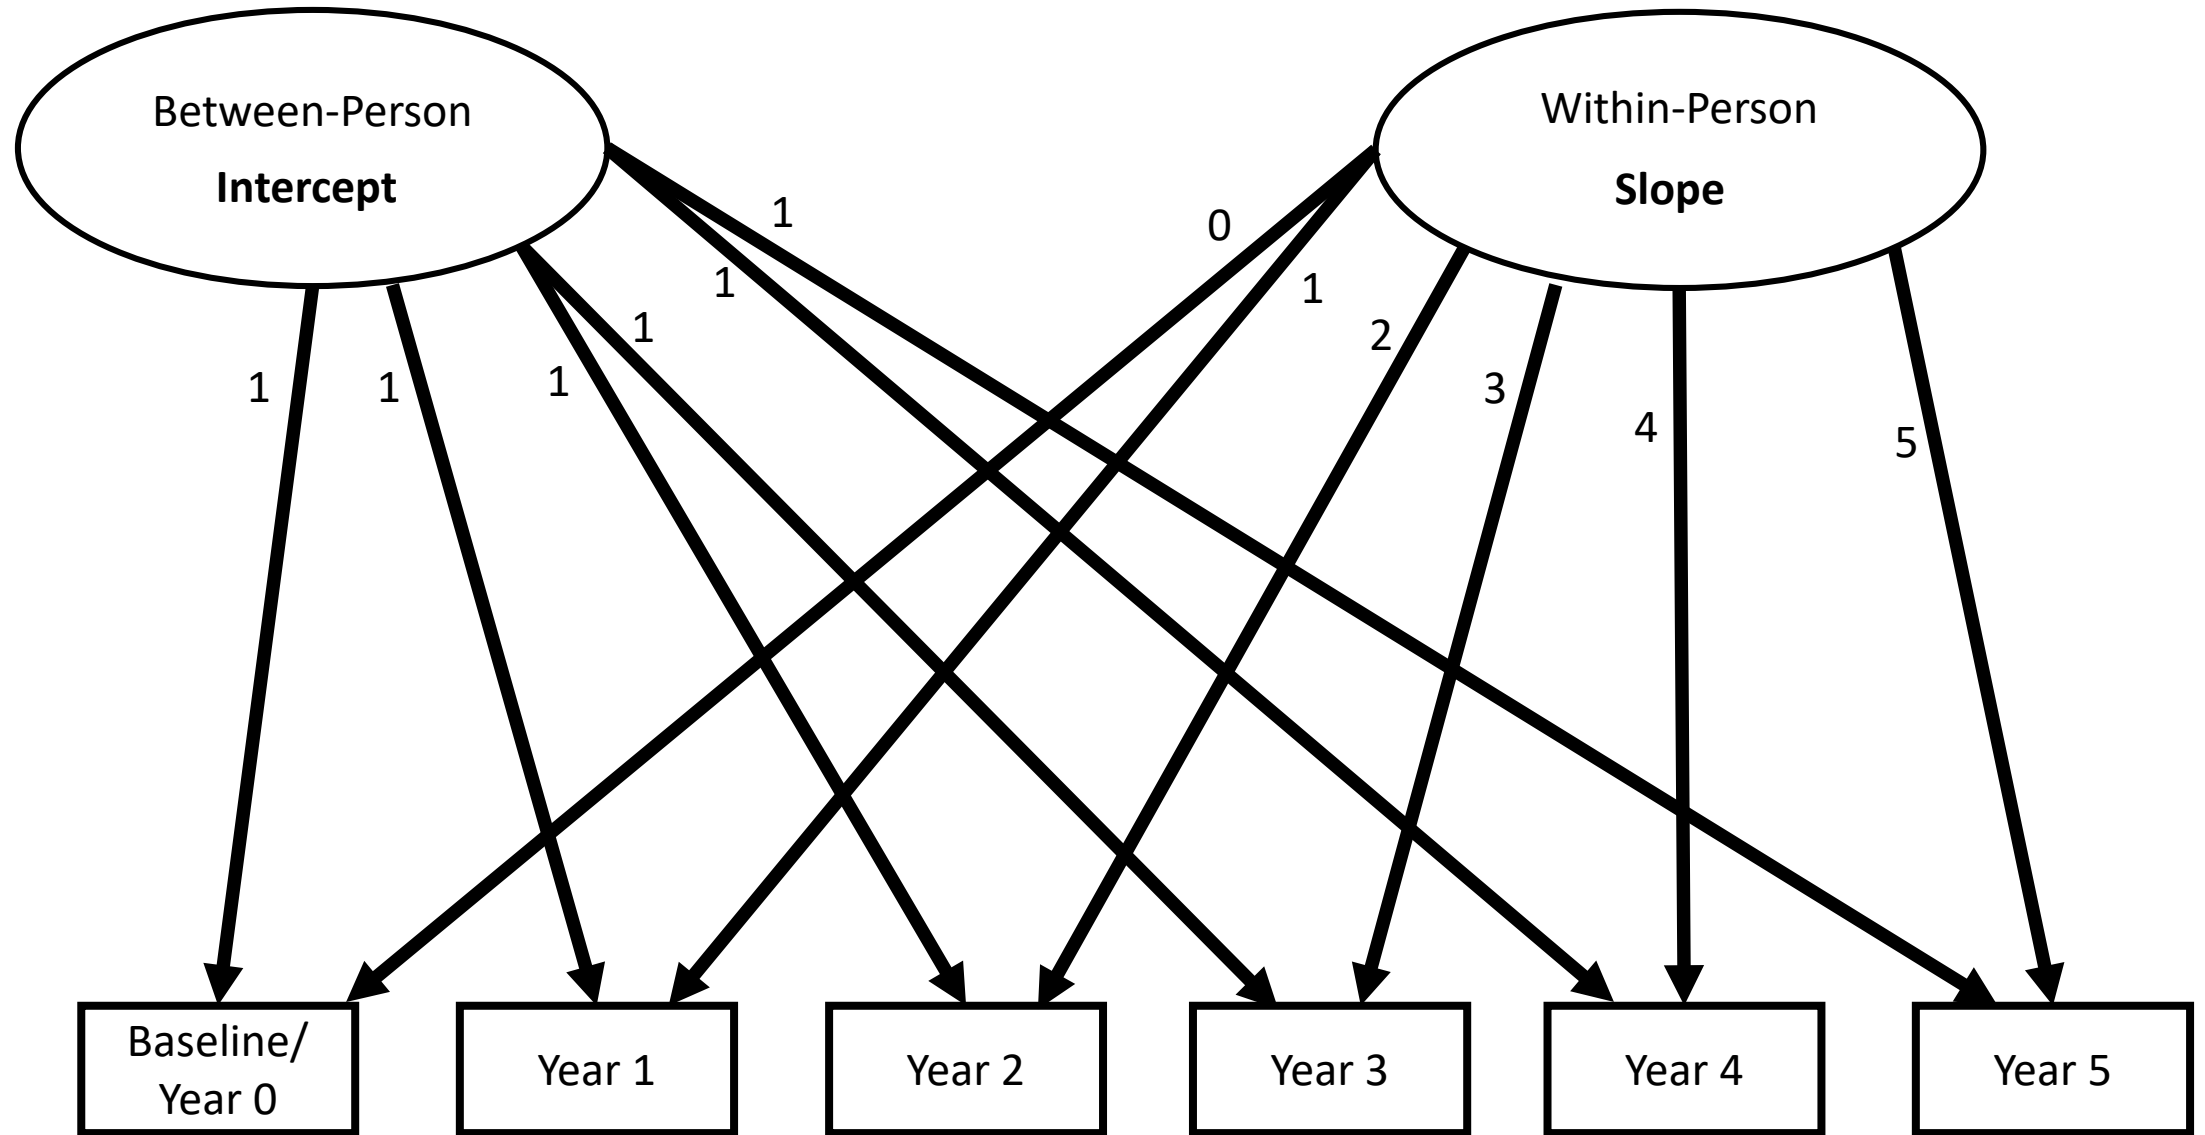

Note: Only Years 2-5 were used to model the between-person and within-person effects for the Physical Activity Scale for the Elderly (PASE).
